# Supplementary material for: Mapping deformation dynamics to composition of topologically-active DNA blends
Source: Royal Society of Chemistry journal article supplement (doi:10.1039/d4sm01065e), 2024-01-01
Supplement: d4sm01065e1.xlsx [file d4sm01065e1.xlsx]

## Sheet: AFvsC
	Alignment Factor
c/c*	std.error	8 um	std.error	11 um	std.error	13 um	std.error	15 um	std.error	17 um	std.error	19 um	std.error	21 um	std.error	23 um	std.error	25 um	std.error	27 um	std.error
5.38897	0.02436	0.0055	0.000200194	0.00416	0.000196299	0.00388	0.000157727	0.00359	0.000143798	0.00231	9.07377e-05	0.00144	0.000115662	0.00164	0.000135933	0.00138	0.000112002	0.00141	0.000120185	0.000872873	0.000233623
5.5507	0.0401	0.00503	5.50757e-05	0.00447	0.000357507	0.00336	0.000177858	0.00328	8.14453e-05	0.00192	0.00011865	0.000669443	8.07038e-05	0.000743227	0.00012868	0.000866279	5.56493e-05	0.00141	7.57188e-05	0.00177	0.000107858
5.74641	0.03231	0.00715	0.000634306	0.00688	0.000547032	0.00534	0.000558301	0.0041	0.000347707	0.00221	0.000308022	0.00164	0.000376882	0.00109	0.000163246	0.00118	0.000117392	0.000960693	0.000120329	0.00119	0.00027175
5.95384	0.04729	0.00807	0.000408588	0.0072	0.000336502	0.00562	0.000426784	0.00382	0.000306938	0.00226	8.87568e-05	0.00193	0.00016231	0.0017	4.6188e-05	0.00146	9.83757e-05	0.000715455	0.000147279	0.000601356	0.000128716
6.344	0.08132	0.00747	0.000409566	0.00694	0.000403168	0.00492	0.000284156	0.00313	0.000246599	0.00182	0.000196327	0.000854017	7.61906e-05	0.00119	0.000132649	0.00143	0.00011893	0.000818216	3.96491e-05	0.00118	0.000155369
6.91901	0.12322	0.01025	0.000288444	0.00841	0.00020955	0.00637	0.00028002	0.00398	0.000154955	0.00222	0.000156773	0.000830018	6.79547e-05	0.00107	5.15461e-05	0.00153	0.000122384	0.00125	4e-05	0.0018	8.41295e-05
7.43518	0.13231	0.00916	0.000326207	0.00787	0.000267665	0.00598	0.000176761	0.00363	0.000272356	0.00217	0.000305632	0.00118	0.000327034	0.00105	0.000110106	0.00118	0.000100324	0.000942371	0.000197966	0.0014	0.000246964
8.17426	0.14547	0.00942	0.000437962	0.00904	0.000309426	0.00728	0.000329157	0.00535	0.000291795	0.00369	0.000161692	0.00261	9.2376e-05	0.00147	6.65833e-05	0.000610382	8.08253e-05	0.000351344	7.38527e-05	0.000806336	6.18755e-05
8.88864	0.11357	0.0113	0.000467666	0.00995	0.000449531	0.00777	0.000262446	0.00573	0.000228546	0.00346	0.000131149	0.00205	0.000124141	0.000830591	0.000151313	0.000614442	5.33945e-05	0.000734349	4.44008e-05	0.00121	4.58258e-05
9.69462	0.22122	0.01319	5.23874e-05	0.01116	6.35959e-05	0.00868	5.78312e-05	0.0063	0.000103494	0.00367	0.000125477	0.00263	0.000154524	0.000797264	3.60943e-05	0.000909838	7.45929e-05	0.000605933	6.1361e-05	0.000810408	0.000112924
10.5858	0.20588	0.01264	0.000369745	0.01035	0.000459069	0.00876	0.00019936	0.00605	0.000168622	0.00375	0.000143798	0.00266	0.000180216	0.000884737	0.000132657	0.000957632	6.74295e-05	0.000622655	8.51639e-05	0.00042409	4.55678e-05
12.5905	1.13617	0.01248	0.000520801	0.01037	0.000459613	0.00844	0.000811918	0.006	0.000520459	0.00395	0.00015836	0.00246	6.76593e-05	0.00084077	0.000101674	0.000986624	6.74529e-05	0.000731349	5.17743e-05	0.000374022	0.000113065
16.4162	0.65159	0.01142	9.76957e-05	0.0104	0.000157621	0.00772	8.68588e-05	0.00546	7.79601e-05	0.00407	8.41295e-05	0.00229	8.66667e-05	0.000788687	2.65376e-05	0.000761738	4.48192e-05	0.000839117	6.66359e-05	0.000642319	0.000120453
19.1187	0.57058	0.01146	3.38296e-05	0.01076	0.000156773	0.00766	0.000226789	0.00518	0.000167365	0.00321	0.000365574	0.00149	0.000144684	0.000555976	0.000110065	0.000473866	8.99207e-05	0.000756326	3.62552e-05	0.00125	0.000102035
20.9805	0.12401	0.01208	0.000219621	0.01063	0.000248462	0.00795	4.16333e-05	0.00537	0.000110151	0.00273	4.04145e-05	0.00135	7.83865e-05	0.000484128	5.69097e-05	0.000315576	0.000104285	0.0006494	3.84377e-05	0.00109	9.34378e-05
21.5491	0.08703	0.01178	9.70109e-05	0.0103	8.14453e-05	0.00744	0.000290364	0.00487	0.000147686	0.00314	9e-05	0.00174	0.000167564	0.000865838	6.39954e-05	0.000668841	0.0001192	0.000287626	7.5264e-05	0.000727007	4.8372e-05
21.8526	0.05165	0.01222	0.000182239	0.01049	5.50757e-05	0.00765	0.000263965	0.00528	0.000361909	0.00327	0.000270883	0.00197	0.000283078	0.000998941	0.000174028	0.000865397	0.000160348	0.000315788	0.000138281	0.000916124	7.65215e-05
22.0842	0.04378	0.011	0.000657073	0.00964	0.00044916	0.00786	0.000387341	0.00573	0.000196412	0.00305	4.05518e-05	0.00216	0.000116667	0.00117	9.52774e-05	0.00108	8.5757e-05	0.000733749	4.29357e-05	0.00111	9.06829e-05
22.2352	0.03013	0.00975	0.000230651	0.00854	0.000332616	0.00664	0.000497427	0.00488	0.000368556	0.00259	0.000323316	0.00193	0.000316596	0.00138	8.68588e-05	0.00094816	5.98457e-05	0.000766566	9.98053e-05	0.00104	2e-05
22.3583	0.01783	0.01116	0.000354087	0.00907	0.000417612	0.00632	0.000317822	0.00485	0.000336502	0.00269	0.000380044	0.00175	0.000134454	0.00142	0.000174579	0.00105	0.000151254	0.000770773	9.23724e-05	0.000686641	6.26975e-05
22.4451	0.0242634	0.0104033	0.00063881	0.00944	0.000597188	0.00673333	0.000484573	0.00500667	0.000226593	0.00340333	0.000106823	0.00179333	6.22718e-05	0.00130333	6.43774e-05	0.000885667	8.71786e-05	0.00066	7.01498e-05	0.000600333	8.61672e-05
22.5553	0.00414416	0.00983	0.000332941	0.0088075	0.000476294	0.00704	0.000430949	0.004845	0.000327885	0.002975	0.000257051	0.0017975	0.000121544	0.00103475	0.000166216	0.0006185	7.61145e-05	0.00035725	4.52868e-05	0.00083425	0.000100709

## Sheet: AFvsY
Distance	Alignment factor		c/c*
y (um)	5.38897	std. err	5.5507	std. err	5.74641	std. err	5.95384	std. err	6.344	std. err	6.91901	std. err	7.43518	std. err	8.17426	std. err	8.88864	std. err	9.69462	std. err	10.5858	std. err	12.5905	std. err	16.4162	std. err	19.1187	std. err	20.9805	std. err	21.5491	std. err	21.8526	std. err	22.0842	std. err	22.2352	std. err	22.3583	std. err	22.4451	std. err	22.5553	std. err
8.3736	0.0055	0.000200194	0.00503	5.50757e-05	0.00715	0.000634306	0.00807	0.000408588	0.00747	0.000409566	0.01025	0.000288444	0.00916	0.000326207	0.00942	0.000437962	0.0113	0.000467666	0.01319	5.23874e-05	0.01264	0.000369745	0.01248	0.000520801	0.01142	9.76957e-05	0.01146	3.38296e-05	0.01208	0.000219621	0.01178	9.70109e-05	0.01222	0.000182239	0.011	0.000657073	0.00975	0.000230651	0.01116	0.000354087	0.0104033	0.00063881	0.00983	0.000332941
10.467	0.00416	0.000196299	0.00447	0.000357507	0.00688	0.000547032	0.0072	0.000336502	0.00694	0.000403168	0.00841	0.00020955	0.00787	0.000267665	0.00904	0.000309426	0.00995	0.000449531	0.01116	6.35959e-05	0.01035	0.000459069	0.01037	0.000459613	0.0104	0.000157621	0.01076	0.000156773	0.01063	0.000248462	0.0103	8.14453e-05	0.01049	5.50757e-05	0.00964	0.00044916	0.00854	0.000332616	0.00907	0.000417612	0.00944	0.000597188	0.0088075	0.000476294
12.5604	0.00388	0.000157727	0.00336	0.000177858	0.00534	0.000558301	0.00562	0.000426784	0.00492	0.000284156	0.00637	0.00028002	0.00598	0.000176761	0.00728	0.000329157	0.00777	0.000262446	0.00868	5.78312e-05	0.00876	0.00019936	0.00844	0.000811918	0.00772	8.68588e-05	0.00766	0.000226789	0.00795	4.16333e-05	0.00744	0.000290364	0.00765	0.000263965	0.00786	0.000387341	0.00664	0.000497427	0.00632	0.000317822	0.00673333	0.000484573	0.00704	0.000430949
14.6538	0.00359	0.000143798	0.00328	8.14453e-05	0.0041	0.000347707	0.00382	0.000306938	0.00313	0.000246599	0.00398	0.000154955	0.00363	0.000272356	0.00535	0.000291795	0.00573	0.000228546	0.0063	0.000103494	0.00605	0.000168622	0.006	0.000520459	0.00546	7.79601e-05	0.00518	0.000167365	0.00537	0.000110151	0.00487	0.000147686	0.00528	0.000361909	0.00573	0.000196412	0.00488	0.000368556	0.00485	0.000336502	0.00500667	0.000226593	0.004845	0.000327885
16.7472	0.00231	9.07377e-05	0.00192	0.00011865	0.00221	0.000308022	0.00226	8.87568e-05	0.00182	0.000196327	0.00222	0.000156773	0.00217	0.000305632	0.00369	0.000161692	0.00346	0.000131149	0.00367	0.000125477	0.00375	0.000143798	0.00395	0.00015836	0.00407	8.41295e-05	0.00321	0.000365574	0.00273	4.04145e-05	0.00314	9e-05	0.00327	0.000270883	0.00305	4.05518e-05	0.00259	0.000323316	0.00269	0.000380044	0.00340333	0.000106823	0.002975	0.000257051
18.8406	0.00144	0.000115662	0.000669443	8.07038e-05	0.00164	0.000376882	0.00193	0.00016231	0.000854017	7.61906e-05	0.000830018	6.79547e-05	0.00118	0.000327034	0.00261	9.2376e-05	0.00205	0.000124141	0.00263	0.000154524	0.00266	0.000180216	0.00246	6.76593e-05	0.00229	8.66667e-05	0.00149	0.000144684	0.00135	7.83865e-05	0.00174	0.000167564	0.00197	0.000283078	0.00216	0.000116667	0.00193	0.000316596	0.00175	0.000134454	0.00179333	6.22718e-05	0.0017975	0.000121544
20.934	0.00164	0.000135933	0.000743227	0.00012868	0.00109	0.000163246	0.0017	4.6188e-05	0.00119	0.000132649	0.00107	5.15461e-05	0.00105	0.000110106	0.00147	6.65833e-05	0.000830591	0.000151313	0.000797264	3.60943e-05	0.000884737	0.000132657	0.00084077	0.000101674	0.000788687	2.65376e-05	0.000555976	0.000110065	0.000484128	5.69097e-05	0.000865838	6.39954e-05	0.000998941	0.000174028	0.00117	9.52774e-05	0.00138	8.68588e-05	0.00142	0.000174579	0.00130333	6.43774e-05	0.00103475	0.000166216
23.0274	0.00138	0.000112002	0.000866279	5.56493e-05	0.00118	0.000117392	0.00146	9.83757e-05	0.00143	0.00011893	0.00153	0.000122384	0.00118	0.000100324	0.000610382	8.08253e-05	0.000614442	5.33945e-05	0.000909838	7.45929e-05	0.000957632	6.74295e-05	0.000986624	6.74529e-05	0.000761738	4.48192e-05	0.000473866	8.99207e-05	0.000315576	0.000104285	0.000668841	0.0001192	0.000865397	0.000160348	0.00108	8.5757e-05	0.00094816	5.98457e-05	0.00105	0.000151254	0.000885667	8.71786e-05	0.0006185	7.61145e-05
25.1208	0.00141	0.000120185	0.00141	7.57188e-05	0.000960693	0.000120329	0.000715455	0.000147279	0.000818216	3.96491e-05	0.00125	4e-05	0.000942371	0.000197966	0.000351344	7.38527e-05	0.000734349	4.44008e-05	0.000605933	6.1361e-05	0.000622655	8.51639e-05	0.000731349	5.17743e-05	0.000839117	6.66359e-05	0.000756326	3.62552e-05	0.0006494	3.84377e-05	0.000287626	7.5264e-05	0.000315788	0.000138281	0.000733749	4.29357e-05	0.000766566	9.98053e-05	0.000770773	9.23724e-05	0.00066	7.01498e-05	0.00035725	4.52868e-05
27.2142	0.000872873	0.000233623	0.00177	0.000107858	0.00119	0.00027175	0.000601356	0.000128716	0.00118	0.000155369	0.0018	8.41295e-05	0.0014	0.000246964	0.000806336	6.18755e-05	0.00121	4.58258e-05	0.000810408	0.000112924	0.00042409	4.55678e-05	0.000374022	0.000113065	0.000642319	0.000120453	0.00125	0.000102035	0.00109	9.34378e-05	0.000727007	4.8372e-05	0.000916124	7.65215e-05	0.00111	9.06829e-05	0.00104	2e-05	0.000686641	6.26975e-05	0.000600333	8.61672e-05	0.00083425	0.000100709

## Sheet: AFvsbetavsK
For y<= 15 um								for y>15 um
AF	std. error	Beta	std. error	K	std. error			AF	std. error	Beta	std. error	K	std. error
0.0055	0.0002	1.82062	0.000941	0.71246	0.00619			0.00231	9.07e-05	1.91074	0.00479	0.63681	0.00221
0.00416	0.000196	1.85137	0.0013	0.68778	0.00458			0.00144	0.000116	1.92933	0.00227	0.62223	0.000815
0.00388	0.000158	1.88378	0.00281	0.65167	0.00212			0.00164	0.000136	1.91085	0.000822	0.66687	0.00172
0.00359	0.000144	1.89401	0.00156	0.64197	0.00293			0.00138	0.000112	1.90955	0.000713	0.64655	0.000997
0.00503	5.51e-05	1.8136	0.00148	0.66631	0.00938			0.00141	0.00012	1.88872	0.000837	0.66271	0.00179
0.00447	0.000358	1.8478	0.000373	0.65323	0.00646			0.000873	0.000234	1.90055	0.00363	0.66848	0.00247
0.00336	0.000178	1.88351	0.00122	0.63579	0.00362			0.00192	0.000119	1.90774	0.00187	0.61885	0.00492
0.00328	8.14e-05	1.89957	0.00126	0.62004	0.00588			0.000669	8.07e-05	1.92555	0.000512	0.61146	0.00452
0.00715	0.000634	1.80195	0.00293	0.64586	0.00152			0.000743	0.000129	1.91512	0.0037	0.65029	0.00724
0.00688	0.000547	1.84135	0.00296	0.6376	0.000941			0.000866	5.56e-05	1.90904	0.00139	0.63976	0.00562
0.00534	0.000558	1.87848	0.00389	0.61539	0.00391			0.00141	7.57e-05	1.89621	0.00246	0.64085	0.01003
0.0041	0.000348	1.89045	0.00349	0.58958	0.00599			0.00177	0.000108	1.9071	0.00134	0.6361	0.01148
0.00807	0.000409	1.78578	0.00387	0.64053	0.00493			0.00221	0.000308	1.89504	0.0061	0.58807	0.00613
0.0072	0.000337	1.82892	0.0019	0.62171	0.00722			0.00164	0.000377	1.91654	0.00226	0.57075	0.00997
0.00562	0.000427	1.87399	0.0012	0.57822	0.00934			0.00109	0.000163	1.92246	0.00147	0.5843	0.01796
0.00382	0.000307	1.89779	0.00362	0.55367	0.00707			0.00118	0.000117	1.9125	0.000498	0.5787	0.01823
0.00747	0.00041	1.77043	0.00341	0.59388	0.01081			0.000961	0.00012	1.90479	0.00196	0.55339	0.02338
0.00694	0.000403	1.81737	0.00297	0.56582	0.01197			0.00119	0.000272	1.9129	0.000633	0.54811	0.0211
0.00492	0.000284	1.865	0.00421	0.52106	0.01162			0.00226	8.88e-05	1.89764	0.00128	0.54733	0.008
0.00313	0.000247	1.89371	0.00258	0.50606	0.01021			0.00193	0.000162	1.91435	0.00153	0.51895	0.00728
0.01025	0.000288	1.75525	0.00193	0.54563	0.0076			0.0017	4.62e-05	1.9361	0.00354	0.49923	0.01055
0.00841	0.00021	1.80875	0.000338	0.51391	0.00865			0.00146	9.84e-05	1.9212	0.0021	0.48956	0.01184
0.00637	0.00028	1.85259	0.00168	0.4719	0.00834			0.000715	0.000147	1.92524	0.00505	0.45436	0.00972
0.00398	0.000155	1.89381	0.000703	0.45429	0.00965			0.000601	0.000129	1.92371	0.00301	0.45662	0.0092
0.00916	0.000326	1.75226	0.00138	0.49954	0.01031			0.00182	0.000196	1.89763	0.00251	0.49343	0.01155
0.00787	0.000268	1.80694	0.00118	0.46587	0.01073			0.000854	7.62e-05	1.91001	0.00163	0.47234	0.00942
0.00598	0.000177	1.84799	0.000473	0.4306	0.00953			0.00119	0.000133	1.9497	0.00243	0.45167	0.0068
0.00363	0.000272	1.89686	0.00288	0.40133	0.01189			0.00143	0.000119	1.92774	0.00115	0.44292	0.00515
0.00942	0.000438	1.74182	0.00323	0.45041	0.00805			0.000818	3.96e-05	1.93974	0.000701	0.42262	0.00192
0.00904	0.000309	1.80829	0.00078	0.41252	0.00945			0.00118	0.000155	1.92723	0.001	0.41629	0.00404
0.00728	0.000329	1.85498	0.00261	0.37305	0.01178			0.00222	0.000157	1.89119	0.00107	0.44005	0.00904
0.00535	0.000292	1.89845	0.000777	0.33869	0.01127			0.00083	6.8e-05	1.90639	0.000956	0.42127	0.00906
0.0113	0.000468	1.73111	0.0026	0.42342	0.00431			0.00107	5.15e-05	1.94778	0.00263	0.4123	0.00744
0.00995	0.00045	1.805	0.00246	0.38085	0.00483			0.00153	0.000122	1.92563	0.00117	0.41173	0.0065
0.00777	0.000262	1.86236	0.000638	0.32997	0.00539			0.00125	4e-05	1.93884	0.000619	0.40107	0.00437
0.00573	0.000229	1.89485	0.00207	0.30179	0.00483			0.0018	8.41e-05	1.93004	0.000672	0.3932	0.00277
0.01319	5.24e-05	1.71484	0.00505	0.40843	0.00281			0.00217	0.000306	1.90698	0.00334	0.39255	0.01069
0.01116	6.36e-05	1.79128	0.00321	0.36838	0.00202			0.00118	0.000327	1.91745	0.00331	0.37758	0.00923
0.00868	5.78e-05	1.85613	0.00266	0.32457	0.000299			0.00105	0.00011	1.94039	0.00187	0.38157	0.00626
0.0063	0.000103	1.88436	0.00336	0.29928	0.000818			0.00118	0.0001	1.92606	0.000858	0.37801	0.00718
0.01264	0.00037	1.69809	0.00184	0.40118	0.00125			0.000942	0.000198	1.94116	0.00171	0.37815	0.00589
0.01035	0.000459	1.78042	0.00207	0.36308	0.00189			0.0014	0.000247	1.92936	0.000833	0.38347	0.00353
0.00876	0.000199	1.84663	0.00132	0.32922	0.00156			0.00369	0.000162	1.92001	0.000652	0.33469	0.01058
0.00605	0.000169	1.87157	0.00156	0.31168	0.00162			0.00261	9.24e-05	1.92635	0.00169	0.32774	0.01022
0.01248	0.000521	1.71173	0.01531	0.40211	0.00367			0.00147	6.66e-05	1.92717	0.0031	0.34111	0.0099
0.01037	0.00046	1.78653	0.01547	0.36496	0.00727			0.00061	8.08e-05	1.92939	0.002	0.33377	0.01012
0.00844	0.000812	1.845	0.00987	0.32699	0.000963			0.000351	7.39e-05	1.94063	0.000462	0.33284	0.01131
0.006	0.00052	1.87052	0.00704	0.30813	0.00423			0.000806	6.19e-05	1.93212	0.00058	0.34644	0.01065
0.01142	9.77e-05	1.73989	0.0018	0.42005	0.00289			0.00346	0.000131	1.92651	0.000612	0.29944	0.00374
0.0104	0.000158	1.81316	0.000214	0.38666	0.00204			0.00205	0.000124	1.93559	0.00045	0.29221	0.00386
0.00772	8.69e-05	1.86138	0.00127	0.33622	0.00126			0.000831	0.000151	1.92377	0.00196	0.2996	0.0048
0.00546	7.8e-05	1.88758	0.000426	0.31351	0.00292			0.000614	5.34e-05	1.932	0.000139	0.28966	0.00505
0.01146	3.38e-05	1.73884	0.000946	0.43574	0.00177			0.000734	4.44e-05	1.94129	0.000521	0.28834	0.00369
0.01076	0.000157	1.81006	0.00104	0.39933	0.00175			0.00121	4.58e-05	1.93365	0.000582	0.29767	0.00665
0.00766	0.000227	1.85595	0.00117	0.34893	0.00312			0.00367	0.000125	1.91931	0.00551	0.29692	0.0007
0.00518	0.000167	1.88605	0.000927	0.33099	0.00209			0.00263	0.000155	1.92649	0.00474	0.292	0.00125
0.01208	0.00022	1.74473	0.00169	0.4469	0.0017			0.000797	3.61e-05	1.91202	0.00264	0.29586	0.00143
0.01063	0.000248	1.80975	0.000619	0.40887	0.000731			0.00091	7.46e-05	1.92784	0.00171	0.28625	0.00182
0.00795	4.16e-05	1.85074	0.000134	0.36731	0.00291			0.000606	6.14e-05	1.93286	0.00246	0.29508	0.00392
0.00537	0.00011	1.88581	0.00147	0.34082	0.00174			0.00081	0.000113	1.93596	0.00157	0.28603	0.000925
0.01178	9.7e-05	1.75826	0.00275	0.44937	0.000908			0.00375	0.000144	1.90028	0.00174	0.30197	0.00152
0.0103	8.14e-05	1.81505	0.000942	0.40599	0.00203			0.00266	0.00018	1.90937	0.00143	0.29265	0.00374
0.00744	0.00029	1.8584	0.00278	0.36718	0.00258			0.000885	0.000133	1.90703	0.00118	0.29674	0.00322
0.00487	0.000148	1.88963	0.00137	0.34482	0.00101			0.000958	6.74e-05	1.91771	0.00236	0.28469	0.00435
0.01222	0.000182	1.7661	0.00371	0.44001	0.00231			0.000623	8.52e-05	1.91725	0.00303	0.29895	0.0039
0.01049	5.51e-05	1.82837	0.0045	0.39168	0.00248			0.000424	4.56e-05	1.93085	0.00113	0.28981	0.00159
0.00765	0.000264	1.86906	0.00134	0.35056	0.00326			0.00395	0.000158	1.90006	0.00328	0.29824	0.00034
0.00528	0.000362	1.89296	0.000824	0.337	0.00143			0.00246	6.77e-05	1.91164	0.01087	0.28831	0.00769
0.011	0.000657	1.76825	0.000883	0.43068	0.000923			0.000841	0.000102	1.90937	0.01115	0.2901	0.00453
0.00964	0.000449	1.84653	0.00358	0.38474	0.000631			0.000987	6.75e-05	1.9211	0.01302	0.27314	0.00515
0.00786	0.000387	1.8741	0.000487	0.34019	0.0015			0.000731	5.18e-05	1.91427	0.00692	0.28694	0.00489
0.00573	0.000196	1.89872	0.000597	0.3336	0.000634			0.000374	0.000113	1.92531	0.00357	0.28913	0.00537
0.00975	0.000231	1.76026	0.00248	0.43955	0.00317			0.00407	8.41e-05	1.90675	0.000191	0.3062	0.00118
0.00854	0.000333	1.85043	0.0023	0.38582	0.00112			0.00229	8.67e-05	1.93079	0.000688	0.30781	0.000311
0.00664	0.000497	1.86964	0.00385	0.34395	0.00117			0.000789	2.65e-05	1.93094	0.000621	0.30406	0.000549
0.00488	0.000369	1.8966	0.00171	0.32879	0.00184			0.000762	4.48e-05	1.94224	0.00165	0.29599	0.00365
0.01116	0.000354	1.75302	0.00198	0.45369	0.000791			0.000839	6.66e-05	1.9282	0.000157	0.30386	0.00289
0.00907	0.000418	1.83856	0.00409	0.38769	0.000272			0.000642	0.00012	1.92116	0.00102	0.30566	0.0014
0.00632	0.000318	1.86029	0.000471	0.35726	0.00143			0.00321	0.000366	1.905	0.000506	0.317	0.00196
0.00485	0.000337	1.8908	0.000969	0.33319	0.00181			0.00149	0.000145	1.92534	0.00208	0.31054	0.000958
0.0104	0.00063881	1.7511	0.00509	0.434	0.00762			0.000556	0.00011	1.92695	0.000967	0.30438	0.00126
0.00944	0.000597188	1.82564	0.00321	0.39098	0.0021			0.000474	8.99e-05	1.93757	0.000844	0.30738	0.00105
0.00673	0.000484573	1.86657	0.00384	0.36394	0.00243			0.000756	3.63e-05	1.92637	0.00046	0.31286	0.000312
0.00501	0.000226593	1.89572	0.00308	0.33669	0.00219			0.00125	0.000102	1.92295	0.000309	0.30511	0.00235
0.00983	0.000332941	1.75426	0.00766	0.46227	0.00722			0.00273	4.04e-05	1.90972	0.00135	0.33248	0.0031
0.00881	0.000476294	1.82603	0.00364	0.43315	0.0073			0.00135	7.84e-05	1.92322	0.00021	0.32163	0.00323
0.00704	0.000430949	1.88284	0.000867847	0.38282	0.00156			0.000484	5.69e-05	1.92768	0.000615	0.30908	0.00273
0.00485	0.000327885	1.91006	0.000979323	0.34619	0.00163			0.000316	0.000104	1.93332	0.00105	0.30776	0.00189
								0.000649	3.84e-05	1.92637	2.65e-05	0.31164	0.000343
								0.00109	9.34e-05	1.92301	0.000527	0.29732	0.000156
								0.00314	9e-05	1.91613	0.00236	0.33629	0.00287
								0.00174	0.000168	1.92003	0.000466	0.32491	0.00271
								0.000866	6.4e-05	1.92714	0.000585	0.31935	0.00109
								0.000669	0.000119	1.92504	0.0006	0.32109	0.00176
								0.000288	7.53e-05	1.92223	0.000692	0.31845	0.00095
								0.000727	4.84e-05	1.92027	0.00133	0.30935	0.00344
								0.00327	0.000271	1.92427	0.00173	0.31622	0.00378
								0.00197	0.000283	1.92372	0.00157	0.29933	0.0048
								0.000999	0.000174	1.9323	0.0021	0.30427	0.0043
								0.000865	0.00016	1.92735	0.0029	0.31282	0.00383
								0.000316	0.000138	1.92484	0.00319	0.31143	0.00328
								0.000916	7.65e-05	1.91443	0.000509	0.3143	0.00148
								0.00305	4.06e-05	1.93675	0.00128	0.31008	0.000659
								0.00216	0.000117	1.93325	0.000825	0.29433	0.00298
								0.00117	9.53e-05	1.95356	0.00263	0.29493	0.00126
								0.00108	8.58e-05	1.94398	0.00181	0.3025	0.000659
								0.000734	4.29e-05	1.93341	0.000239	0.30035	0.000598
								0.00111	9.07e-05	1.91499	0.00074	0.30266	0.00114
								0.00259	0.000323	1.9348	0.00224	0.30811	0.00168
								0.00193	0.000317	1.93931	0.000953	0.30458	0.00106
								0.00138	8.69e-05	1.96451	0.00677	0.30098	0.00173
								0.000948	5.98e-05	1.95558	0.00522	0.30643	0.0012
								0.000767	9.98e-05	1.94112	0.00515	0.30226	0.00086
								0.00104	2e-05	1.92892	0.0111	0.29733	0.000804
								0.00269	0.00038	1.9323	0.00141	0.30945	0.00198
								0.00175	0.000134	1.94666	0.00289	0.30617	0.00137
								0.00142	0.000175	1.98118	0.0012	0.30301	0.000568
								0.00105	0.000151	1.98248	0.00299	0.30364	0.00181
								0.000771	9.24e-05	1.9767	0.00746	0.29649	0.00283
								0.000687	6.27e-05	1.99064	0.00945	0.28622	0.00336
								0.0034	0.000106823	1.93406	0.00102	0.32129	0.000571849
								0.00179	6.22718e-05	1.95153	0.0032	0.30965	0.00353
								0.0013	6.43774e-05	1.96	0.0086	0.30973	0.00127
								0.000885667	8.71786e-05	1.96247	0.00979	0.308	0.00665
								0.00066	7.01498e-05	2.0254	0.00919	0.29907	0.00878
								0.000600333	8.61672e-05	2.02331	0.00847	0.29421	0.00982
								0.00298	0.000257051	1.91957	0.00382	0.33449	0.00571
								0.0018	0.000121544	1.93276	0.00562	0.31809	0.00586
								0.00103	0.000166216	1.94095	0.000604006	0.31978	0.00589
								0.0006185	7.61145e-05	1.93799	0.00404	0.31488	0.00511
								0.00035725	4.52868e-05	1.96157	0.01142	0.31794	0.00493
								0.00083425	0.000100709	1.96403	0.00671	0.31368	0.00149

## Sheet: Tauvsq_1
	Tau (seconds) for different c/c*
q( um-1)	5.38897	std. err	5.5507	std. err	5.74641	std. err	5.95384	std. err	6.344	std. err	6.91901	std. err	7.43518	std. err	8.17426	std. err	8.88864	std. err	9.69462	std. err	10.5858	std. err	12.5905	std. err	16.4162	std. err	19.1187	std. err	20.9805	std. err	21.5491	std. err	21.8526	std. err	22.0842	std. err	22.2352	std. err	22.3583	std. err	22.4451	std. err	22.5553	std. err
1.13279	1.10696	0.06345	1.09398	0.08866	1.08447	0.014	1.2346	0.04346	1.25565	0.05525	1.54414	0.18837	1.42543	0.10863	1.78243	0.14469	1.9611	0.11825	1.79793	0.05463	1.88025	0.02821	1.86851	0.27804	1.82357	0.12334	1.70214	0.08901	1.94069	0.13852	1.89107	0.12972	2.03719	0.24063	2.30153	0.21132	1.89314	0.21681	1.72626	0.02527	1.81216	0.10682	1.75653	0.136669
1.51038	0.64451	0.01939	0.69763	0.02647	0.7417	0.03028	0.73296	0.03016	0.81857	0.00969	0.89879	0.00638	0.97038	0.04189	1.14005	0.04055	1.16143	0.07548	1.24587	0.0369	1.23986	0.04157	1.25688	0.03358	1.15145	0.03242	1.18506	0.07988	1.07822	0.01792	1.09435	0.00227	1.10919	0.05303	1.15826	0.01462	1.12989	0.02451	1.08541	0.03149	1.12851	0.0239205	1.05672	0.0247663
1.88798	0.41109	0.0175	0.43534	0.00739	0.46147	0.00645	0.5262	0.02224	0.56375	0.03388	0.60341	0.01135	0.67925	0.01986	0.76221	0.01343	0.79907	0.03632	0.82152	0.02206	0.85444	0.01666	0.84628	0.00348	0.8446	0.04339	0.75304	0.01806	0.74682	0.01419	0.80307	0.01985	0.79086	0.01164	0.79248	0.02468	0.768	0.03939	0.76072	0.01735	0.79954	0.0239103	0.761827	0.0111908
2.26557	0.28979	0.00528	0.30761	0.00827	0.3603	0.01276	0.37279	0.00803	0.41347	0.00401	0.47552	0.0093	0.52231	0.01079	0.56841	0.01023	0.60667	0.00751	0.62074	0.00702	0.67074	0.01555	0.65743	0.01264	0.60263	0.01114	0.59933	0.00376	0.57935	0.00145	0.6063	0.02154	0.59425	0.02585	0.58872	0.00527	0.58497	0.00921	0.59284	0.01883	0.58541	0.0111474	0.566887	0.00433078
2.64317	0.23286	0.00815	0.2283	0.0043	0.26568	0.01113	0.28278	0.00508	0.31479	0.000877674	0.35552	0.01213	0.40731	0.01971	0.4415	0.00919	0.47499	0.00471	0.50792	0.00781	0.50369	0.00565	0.5031	0.01732	0.46012	0.00468	0.46674	0.00227	0.46791	0.00639	0.44976	0.00369	0.45591	0.01915	0.45984	0.00674	0.44483	0.01113	0.42738	0.0014	0.451263	0.003205	0.433428	0.00390642
3.02076	0.17581	0.00598	0.18513	0.00383	0.20597	0.00344	0.23303	0.0071	0.24453	0.00797	0.27642	0.00183	0.30933	0.00685	0.35535	0.00363	0.37583	0.00419	0.40905	0.00555	0.41735	0.01523	0.41413	0.01645	0.37321	0.0105	0.36983	0.00744	0.36102	0.00968	0.3635	0.00592	0.37017	0.00317	0.36321	0.00636	0.36104	0.00485	0.37372	0.00914	0.36252	0.002557	0.346042	0.00347001
3.39836	0.14278	0.00667	0.14567	0.00152	0.16374	0.00386	0.17969	0.00754	0.20071	0.00325	0.22781	0.00618	0.24874	0.00483	0.2857	0.00455	0.30221	0.00178	0.32888	0.00541	0.32456	0.00563	0.31878	0.01315	0.28997	0.00832	0.29986	0.00457	0.28483	0.00608	0.28402	0.00473	0.29023	0.00607	0.28815	0.00403	0.28819	0.00285	0.28318	0.00456	0.287553	0.004163	0.277672	0.0013189
3.77595	0.11542	0.00396	0.12284	0.00107	0.13703	0.00476	0.14414	0.00205	0.16445	0.00351	0.18216	0.00395	0.20301	0.0064	0.22676	0.00319	0.25003	0.00493	0.26837	0.00403	0.27212	0.00691	0.259	0.00537	0.24436	0.00865	0.24325	0.01108	0.23301	0.00118	0.23861	0.00174	0.23793	0.00439	0.23665	0.00393	0.24424	0.00284	0.2299	0.00624	0.232197	0.00107039	0.225175	0.00296918
4.15355	0.09743	0.00255	0.10357	0.00163	0.11477	0.00286	0.12377	0.00298	0.13535	0.00175	0.15447	0.00122	0.17045	0.00427	0.19452	0.00676	0.20705	0.00395	0.22118	0.00614	0.22311	0.00502	0.23489	0.00625	0.20232	0.00479	0.20368	0.00228	0.20271	0.00359	0.19599	0.00549	0.19922	0.00369	0.1965	0.00178	0.19372	0.00287	0.19591	0.00268	0.198663	0.00054413	0.188888	0.00121558
4.53114	0.0847	0.00414	0.08984	0.00181	0.09875	0.00366	0.10381	0.00208	0.11807	0.000681477	0.13199	0.00483	0.14753	0.00492	0.15974	0.00254	0.17923	0.00272	0.19509	0.0038	0.18975	0.00378	0.18666	0.00574	0.17087	0.00429	0.17745	0.00196	0.17136	0.00209	0.1699	0.00162	0.17082	0.00219	0.17163	0.00161	0.16839	0.00249	0.1675	0.00382	0.168717	0.00230906	0.16439	0.00201056
4.90874	0.07402	0.00219	0.07668	0.00155	0.08726	0.00319	0.09085	0.000801519	0.10133	0.00243	0.11462	0.00274	0.12563	0.00219	0.14224	0.00272	0.1534	0.00185	0.1651	0.00154	0.16765	0.00246	0.15827	0.00377	0.14902	0.00226	0.15147	0.000973875	0.1435	0.00209	0.14363	0.000791539	0.14843	0.000377374	0.14984	0.00238	0.14481	0.00175	0.14486	0.00249	0.145627	0.00175807	0.140107	0.00192487
5.28633	0.06361	0.00175	0.06582	0.00107	0.07666	0.00324	0.07935	0.00211	0.08792	0.00103	0.09796	0.0046	0.11033	0.00278	0.11973	0.0038	0.13316	0.00135	0.14131	0.00587	0.13966	0.00311	0.14052	0.00503	0.12979	0.00283	0.13116	0.00148	0.1297	0.00461	0.12521	0.00162	0.1275	0.00186	0.12608	0.00263	0.12568	0.00212	0.12646	0.000587093	0.127243	0.00154694	0.121805	0.00126327
5.66393	0.05698	0.00178	0.06045	0.00093126	0.06721	0.00259	0.07012	0.00133	0.07845	0.00323	0.08974	0.00331	0.09704	0.00223	0.10794	0.00233	0.12084	0.00259	0.12399	0.00304	0.12708	0.00119	0.12577	0.0029	0.11826	0.00227	0.11848	0.00126	0.11208	0.000551936	0.11112	0.0024	0.11081	0.00184	0.11681	0.00337	0.11219	0.000896313	0.11223	0.000234829	0.113547	0.0018359	0.107622	0.00158277
6.04152	0.05107	0.00167	0.05275	0.000721349	0.05853	0.00169	0.06162	0.00182	0.06962	0.00168	0.07787	0.0018	0.08593	0.00191	0.09691	0.0039	0.1008	0.00158	0.11529	0.00268	0.1113	0.00127	0.10934	0.00267	0.10334	0.00126	0.10135	0.00195	0.09913	0.00145	0.09961	0.00119	0.0995	0.000807183	0.10171	0.00208	0.10017	0.000392471	0.1002	0.00172	0.0992	0.000649333	0.0951175	0.0011399
6.41912	0.04521	0.00123	0.04696	0.00178	0.05226	0.00178	0.05482	0.000707727	0.05937	0.000329596	0.07039	0.00281	0.07711	0.00162	0.08627	0.00271	0.09112	0.0016	0.09986	0.00274	0.09584	0.000991133	0.0981	0.00173	0.08982	0.00145	0.0901	0.00211	0.08834	0.00155	0.08563	0.00242	0.09269	0.000842938	0.08847	0.00164	0.08877	0.00115	0.08816	0.00162	0.08796	0.00081431	0.08426	0.000858846
6.79671	0.04136	0.00129	0.04256	0.00112	0.04745	0.00072795	0.04897	0.00121	0.05415	0.00216	0.06156	0.00185	0.06712	0.000241822	0.07566	0.00211	0.08163	0.0021	0.08873	0.000552097	0.08813	0.000849137	0.08682	0.00415	0.08068	0.00107	0.08387	0.00194	0.08146	0.00192	0.07733	0.00105	0.07749	0.00097107	0.07876	0.00136	0.07626	0.00107	0.07819	0.00184	0.0789467	0.000365529	0.0761325	0.000823482

## Sheet: Tauq2vsq_1
	Tau*q^2 (seconds) for different c/c*
q( um-1)	5.38897	std. err	5.5507	std. err	5.74641	std. err	5.95384	std. err	6.344	std. err	6.91901	std. err	7.43518	std. err	8.17426	std. err	8.88864	std. err	9.69462	std. err	10.5858	std. err	12.5905	std. err	16.4162	std. err	19.1187	std. err	20.9805	std. err	21.5491	std. err	21.8526	std. err	22.0842	std. err	22.2352	std. err	22.3583	std. err	22.4451	std. err	22.5553	std. err
1.13279	1.42047	0.08142	1.40382	0.11377	1.39161	0.01797	1.58426	0.05577	1.61127	0.07089	1.98146	0.24172	1.82913	0.1394	2.28723	0.18567	2.51651	0.15174	2.30713	0.0701	2.41277	0.03619	2.3977	0.35678	2.34003	0.15827	2.18421	0.11421	2.49032	0.17776	2.42665	0.16646	2.61414	0.30877	2.95335	0.27116	2.4293	0.27821	2.21515	0.03243	2.32539	0.137073	2.254	0.175374
1.51038	1.47028	0.04424	1.59147	0.06038	1.69201	0.06907	1.67206	0.0688	1.86735	0.0221	2.05037	0.01456	2.21368	0.09555	2.60075	0.09251	2.6495	0.17218	2.84213	0.08418	2.82842	0.09484	2.86725	0.07659	2.62675	0.07395	2.70342	0.18222	2.45969	0.04087	2.49647	0.00518	2.53034	0.12097	2.64228	0.03336	2.57755	0.05592	2.4761	0.07183	2.57441	0.0545697	2.41064	0.0564978
1.88798	1.46531	0.06239	1.55176	0.02633	1.64489	0.02298	1.87563	0.07927	2.00946	0.12076	2.15085	0.04045	2.42118	0.07079	2.71687	0.04787	2.84827	0.12946	2.92828	0.07864	3.04563	0.05937	3.01655	0.01241	3.01054	0.15466	2.68419	0.06438	2.66203	0.05058	2.86253	0.07075	2.819	0.04148	2.82477	0.08796	2.7375	0.14041	2.71157	0.06183	2.84994	0.085227	2.71551	0.0398836
2.26557	1.48744	0.02709	1.57892	0.04247	1.84933	0.06547	1.91348	0.04124	2.12228	0.0206	2.44074	0.04773	2.68094	0.05539	2.91754	0.05252	3.1139	0.03855	3.18612	0.03605	3.4428	0.07982	3.37448	0.06486	3.0932	0.05715	3.07625	0.01932	2.97368	0.00743	3.11204	0.11056	3.05015	0.13268	3.02177	0.02706	3.00256	0.04726	3.04292	0.09667	3.00479	0.0572261	2.90971	0.0222284
2.64317	1.62686	0.05691	1.59501	0.03005	1.85611	0.07774	1.97562	0.03549	2.19921	0.00613	2.48379	0.08476	2.84561	0.1377	3.08447	0.06423	3.31842	0.03291	3.54848	0.05456	3.51898	0.03947	3.51483	0.12099	3.21456	0.03271	3.26083	0.01588	3.26901	0.04465	3.14218	0.0258	3.18512	0.13379	3.21262	0.04708	3.10771	0.07773	2.98585	0.00975	3.15268	0.0223836	3.02807	0.0272847
3.02076	1.60423	0.05453	1.68934	0.03493	1.8795	0.03137	2.12636	0.06481	2.23131	0.07276	2.52233	0.01671	2.8226	0.06247	3.24253	0.03314	3.42948	0.03828	3.73258	0.05068	3.80832	0.13897	3.77893	0.1501	3.40551	0.09584	3.3747	0.06785	3.2943	0.08836	3.31694	0.05406	3.3778	0.02896	3.31429	0.05804	3.29446	0.04427	3.41016	0.08337	3.30801	0.0233258	3.15762	0.0316662
3.39836	1.64891	0.07708	1.68236	0.01754	1.89105	0.04462	2.07517	0.08708	2.31793	0.03753	2.63091	0.07135	2.8727	0.05582	3.29955	0.05257	3.49014	0.0206	3.79822	0.06252	3.74833	0.06503	3.68158	0.15188	3.34886	0.09603	3.463	0.05282	3.28946	0.07026	3.28014	0.05464	3.35183	0.07013	3.3278	0.04658	3.32822	0.03293	3.2704	0.05266	3.32091	0.0480769	3.20678	0.0152373
3.77595	1.64559	0.05653	1.75143	0.01528	1.9538	0.06785	2.05507	0.02924	2.34465	0.05005	2.59715	0.05628	2.89443	0.09121	3.23305	0.04554	3.56483	0.07024	3.82632	0.05747	3.87983	0.09851	3.69272	0.07658	3.48399	0.1234	3.46816	0.15805	3.32221	0.01685	3.40201	0.02477	3.39236	0.06254	3.37406	0.0561	3.48232	0.04054	3.27782	0.08898	3.31063	0.0152461	3.21049	0.0423516
4.15355	1.68092	0.04393	1.78673	0.02819	1.97995	0.04933	2.13522	0.05136	2.33506	0.03016	2.66497	0.02108	2.9406	0.07369	3.35585	0.11666	3.57208	0.06822	3.81579	0.10585	3.84915	0.08666	4.05237	0.10789	3.49036	0.08268	3.51394	0.03942	3.49715	0.06186	3.38122	0.09463	3.437	0.06361	3.38995	0.03073	3.342	0.04948	3.37983	0.04631	3.42732	0.00938463	3.25871	0.0209854
4.53114	1.73893	0.08508	1.84453	0.03711	2.02746	0.0751	2.13135	0.04271	2.42405	0.01399	2.70985	0.09923	3.02897	0.10103	3.27973	0.05224	3.67988	0.05574	4.00544	0.07796	3.89573	0.07755	3.83229	0.11784	3.5081	0.08809	3.64333	0.04015	3.5183	0.0429	3.48832	0.03329	3.50714	0.04506	3.52378	0.03308	3.45719	0.05119	3.43905	0.07844	3.46392	0.0473886	3.37516	0.0412611
4.90874	1.78357	0.05273	1.84774	0.03724	2.10251	0.07682	2.1891	0.01931	2.44154	0.05851	2.76177	0.06608	3.02715	0.05268	3.4273	0.06563	3.69629	0.04467	3.97813	0.03715	4.03965	0.05926	3.81355	0.09072	3.59067	0.05439	3.64978	0.02347	3.45782	0.05046	3.46087	0.01907	3.57645	0.00909	3.6105	0.05734	3.48922	0.04217	3.49043	0.05994	3.50898	0.0423845	3.37593	0.0463707
5.28633	1.77751	0.04883	1.83936	0.02981	2.14229	0.09065	2.21755	0.05884	2.45704	0.02877	2.73761	0.12843	3.0832	0.07771	3.34598	0.10631	3.72119	0.03773	3.94904	0.16416	3.90274	0.0869	3.92687	0.14069	3.62692	0.07917	3.66531	0.04138	3.6246	0.12884	3.49903	0.04536	3.56303	0.05193	3.52343	0.07345	3.51207	0.05923	3.53387	0.01641	3.55591	0.0432286	3.40392	0.0352774
5.66393	1.82782	0.05708	1.93914	0.02988	2.15599	0.08319	2.24957	0.04267	2.51669	0.10346	2.87897	0.10631	3.11295	0.07164	3.46273	0.07475	3.87646	0.08317	3.97761	0.09737	4.07685	0.03805	4.03461	0.09291	3.79369	0.07283	3.80096	0.04039	3.59554	0.01771	3.56474	0.07702	3.5549	0.05913	3.74717	0.10808	3.59896	0.02875	3.60024	0.00754	3.64259	0.0588401	3.45254	0.0507705
6.04152	1.86417	0.06112	1.92525	0.02633	2.13634	0.06156	2.24925	0.06653	2.54125	0.06142	2.84238	0.06584	3.13632	0.06957	3.53709	0.14251	3.67932	0.0575	4.20808	0.09769	4.06233	0.04653	3.99091	0.09734	3.77179	0.04601	3.69939	0.0711	3.61812	0.05276	3.63588	0.04352	3.63187	0.02946	3.71241	0.07598	3.6562	0.01432	3.65742	0.06273	3.62088	0.0237403	3.47179	0.0416353
6.41912	1.86288	0.0507	1.93513	0.0735	2.15352	0.07327	2.259	0.02916	2.44635	0.01358	2.90043	0.11562	3.17719	0.06671	3.55463	0.11153	3.75461	0.06594	4.1146	0.11272	3.94923	0.04084	4.04222	0.07113	3.70091	0.05971	3.71258	0.08693	3.63992	0.06367	3.52826	0.09954	3.81944	0.03473	3.64555	0.06758	3.65764	0.04718	3.63278	0.06672	3.6244	0.0336321	3.47198	0.0353595
6.79671	1.91064	0.05946	1.96607	0.05169	2.19212	0.03363	2.26203	0.05583	2.50132	0.09999	2.84394	0.08525	3.10047	0.01117	3.49514	0.09735	3.77092	0.09683	4.09906	0.02551	4.07119	0.03923	4.01067	0.19158	3.72688	0.04963	3.8744	0.08967	3.76307	0.08886	3.57212	0.04839	3.57952	0.04486	3.63834	0.06264	3.52301	0.04955	3.61216	0.08512	3.64691	0.0169537	3.51704	0.0380539

## Sheet: betavsy
Distance	Beta		c/c*
y (um)	5.38897	std. err	5.5507	std. err	5.74641	std. err	5.95384	std. err	6.344	std. err	6.91901	std. err	7.43518	std. err	8.17426	std. err	8.88864	std. err	9.69462	std. err	10.5858	std. err	12.5905	std. err	16.4162	std. err	19.1187	std. err	20.9805	std. err	21.5491	std. err	21.8526	std. err	22.0842	std. err	22.2352	std. err	22.3583	std. err	22.4451	std. err	22.5553	std. err
8.3736	1.82062	0.000940679	1.8136	0.00148	1.80195	0.00293	1.78578	0.00387	1.77043	0.00341	1.75525	0.00193	1.75226	0.00138	1.74182	0.00323	1.73111	0.0026	1.71484	0.00505	1.69809	0.00184	1.71173	0.01531	1.73989	0.0018	1.73884	0.000946273	1.74473	0.00169	1.75826	0.00275	1.7661	0.00371	1.76825	0.00088288	1.76026	0.00248	1.75302	0.00198	1.7511	0.00508561	1.75426	0.00765649
10.467	1.85137	0.0013	1.8478	0.000373333	1.84135	0.00296	1.82892	0.0019	1.81737	0.00297	1.80875	0.000337754	1.80694	0.00118	1.80829	0.000779537	1.805	0.00246	1.79128	0.00321	1.78042	0.00207	1.78653	0.01547	1.81316	0.000214035	1.81006	0.00104	1.80975	0.000618789	1.81505	0.000941771	1.82837	0.0045	1.84653	0.00358	1.85043	0.0023	1.83856	0.00409	1.82564	0.00320949	1.82603	0.0036434
12.5604	1.88378	0.00281	1.88351	0.00122	1.87848	0.00389	1.87399	0.0012	1.865	0.00421	1.85259	0.00168	1.84799	0.000472864	1.85498	0.00261	1.86236	0.000638288	1.85613	0.00266	1.84663	0.00132	1.845	0.00987	1.86138	0.00127	1.85595	0.00117	1.85074	0.000134454	1.8584	0.00278	1.86906	0.00134	1.8741	0.000486861	1.86964	0.00385	1.86029	0.000470886	1.86657	0.00383535	1.88284	0.000867847
14.6538	1.89401	0.00156	1.89957	0.00126	1.89045	0.00349	1.89779	0.00362	1.89371	0.00258	1.89381	0.000703357	1.89686	0.00288	1.89845	0.000777117	1.89485	0.00207	1.88436	0.00336	1.87157	0.00156	1.87052	0.00704	1.88758	0.000425676	1.88605	0.0009269	1.88581	0.00147	1.88963	0.00137	1.89296	0.000823859	1.89872	0.000596946	1.8966	0.00171	1.8908	0.000968624	1.89572	0.00307822	1.91006	0.000979323
16.7472	1.91074	0.00479	1.90774	0.00187	1.89504	0.0061	1.89764	0.00128	1.89763	0.00251	1.89119	0.00107	1.90698	0.00334	1.92001	0.000652414	1.92651	0.000612109	1.91931	0.00551	1.90028	0.00174	1.90006	0.00328	1.90675	0.000190555	1.905	0.000506041	1.90972	0.00135	1.91613	0.00236	1.92427	0.00173	1.93675	0.00128	1.9348	0.00224	1.9323	0.00141	1.93406	0.00102335	1.91957	0.00381674
18.8406	1.92933	0.00227	1.92555	0.000512423	1.91654	0.00226	1.91435	0.00153	1.91001	0.00163	1.90639	0.000955935	1.91745	0.00331	1.92635	0.00169	1.93559	0.000450333	1.92649	0.00474	1.90937	0.00143	1.91164	0.01087	1.93079	0.000687677	1.92534	0.00208	1.92322	0.000209523	1.92003	0.000466202	1.92372	0.00157	1.93325	0.00082479	1.93931	0.000952523	1.94666	0.00289	1.95153	0.00319704	1.93276	0.00561856
20.934	1.91085	0.000822456	1.91512	0.0037	1.92246	0.00147	1.9361	0.00354	1.9497	0.00243	1.94778	0.00263	1.94039	0.00187	1.92717	0.0031	1.92377	0.00196	1.91202	0.00264	1.90703	0.00118	1.90937	0.01115	1.93094	0.000620654	1.92695	0.000967098	1.92768	0.000614989	1.92714	0.000584817	1.9323	0.0021	1.95356	0.00263	1.96451	0.00677	1.98118	0.0012	1.96	0.00859956	1.94095	0.000604006
23.0274	1.90955	0.000713263	1.90904	0.00139	1.9125	0.000497639	1.9212	0.0021	1.92774	0.00115	1.92563	0.00117	1.92606	0.00085795	1.92939	0.002	1.932	0.000138604	1.92784	0.00171	1.91771	0.00236	1.9211	0.01302	1.94224	0.00165	1.93757	0.000843728	1.93332	0.00105	1.92504	0.000600481	1.92735	0.0029	1.94398	0.00181	1.95558	0.00522	1.98248	0.00299	1.96247	0.00978547	1.93799	0.00403854
25.1208	1.88872	0.000836846	1.89621	0.00246	1.90479	0.00196	1.92524	0.00505	1.93974	0.000700508	1.93884	0.000619067	1.94116	0.00171	1.94063	0.000461531	1.94129	0.000520971	1.93286	0.00246	1.91725	0.00303	1.91427	0.00692	1.9282	0.000157092	1.92637	0.000459613	1.92637	2.64575e-05	1.92223	0.000692082	1.92484	0.00319	1.93341	0.000238607	1.94112	0.00515	1.9767	0.00746	2.0254	0.00919376	1.96157	0.0114228
27.2142	1.90055	0.00363	1.9071	0.00134	1.9129	0.000632701	1.92371	0.00301	1.92723	0.001	1.93004	0.000671822	1.92936	0.000833447	1.93212	0.000579952	1.93365	0.000582266	1.93596	0.00157	1.93085	0.00113	1.92531	0.00357	1.92116	0.00102	1.92295	0.000309318	1.92301	0.000526951	1.92027	0.00133	1.91443	0.000508538	1.91499	0.000739962	1.92892	0.0111	1.99064	0.00945	2.02331	0.00846899	1.96402	0.00670863

## Sheet: betavC
	beta
c/c*	std.error	8 um	std.error	11 um	std.error	13 um	std.error	15 um	std.error	17 um	std.error	19 um	std.error	21 um	std.error	23 um	std.error	25 um	std.error	27 um	std.error
5.38897	0.02436	1.82062	0.000940679	1.85137	0.0013	1.88378	0.00281	1.89401	0.00156	1.91074	0.00479	1.92933	0.00227	1.91085	0.000822456	1.90955	0.000713263	1.88872	0.000836846	1.90055	0.00363
5.5507	0.0401	1.8136	0.00148	1.8478	0.000373333	1.88351	0.00122	1.89957	0.00126	1.90774	0.00187	1.92555	0.000512423	1.91512	0.0037	1.90904	0.00139	1.89621	0.00246	1.9071	0.00134
5.74641	0.03231	1.80195	0.00293	1.84135	0.00296	1.87848	0.00389	1.89045	0.00349	1.89504	0.0061	1.91654	0.00226	1.92246	0.00147	1.9125	0.000497639	1.90479	0.00196	1.9129	0.000632701
5.95384	0.04729	1.78578	0.00387	1.82892	0.0019	1.87399	0.0012	1.89779	0.00362	1.89764	0.00128	1.91435	0.00153	1.9361	0.00354	1.9212	0.0021	1.92524	0.00505	1.92371	0.00301
6.344	0.08132	1.77043	0.00341	1.81737	0.00297	1.865	0.00421	1.89371	0.00258	1.89763	0.00251	1.91001	0.00163	1.9497	0.00243	1.92774	0.00115	1.93974	0.000700508	1.92723	0.001
6.91901	0.12322	1.75525	0.00193	1.80875	0.000337754	1.85259	0.00168	1.89381	0.000703357	1.89119	0.00107	1.90639	0.000955935	1.94778	0.00263	1.92563	0.00117	1.93884	0.000619067	1.93004	0.000671822
7.43518	0.13231	1.75226	0.00138	1.80694	0.00118	1.84799	0.000472864	1.89686	0.00288	1.90698	0.00334	1.91745	0.00331	1.94039	0.00187	1.92606	0.00085795	1.94116	0.00171	1.92936	0.000833447
8.17426	0.14547	1.74182	0.00323	1.80829	0.000779537	1.85498	0.00261	1.89845	0.000777117	1.92001	0.000652414	1.92635	0.00169	1.92717	0.0031	1.92939	0.002	1.94063	0.000461531	1.93212	0.000579952
8.88864	0.11357	1.73111	0.0026	1.805	0.00246	1.86236	0.000638288	1.89485	0.00207	1.92651	0.000612109	1.93559	0.000450333	1.92377	0.00196	1.932	0.000138604	1.94129	0.000520971	1.93365	0.000582266
9.69462	0.22122	1.71484	0.00505	1.79128	0.00321	1.85613	0.00266	1.88436	0.00336	1.91931	0.00551	1.92649	0.00474	1.91202	0.00264	1.92784	0.00171	1.93286	0.00246	1.93596	0.00157
10.5858	0.20588	1.69809	0.00184	1.78042	0.00207	1.84663	0.00132	1.87157	0.00156	1.90028	0.00174	1.90937	0.00143	1.90703	0.00118	1.91771	0.00236	1.91725	0.00303	1.93085	0.00113
12.5905	1.13617	1.71173	0.01531	1.78653	0.01547	1.845	0.00987	1.87052	0.00704	1.90006	0.00328	1.91164	0.01087	1.90937	0.01115	1.9211	0.01302	1.91427	0.00692	1.92531	0.00357
16.4162	0.65159	1.73989	0.0018	1.81316	0.000214035	1.86138	0.00127	1.88758	0.000425676	1.90675	0.000190555	1.93079	0.000687677	1.93094	0.000620654	1.94224	0.00165	1.9282	0.000157092	1.92116	0.00102
19.1187	0.57058	1.73884	0.000946273	1.81006	0.00104	1.85595	0.00117	1.88605	0.0009269	1.905	0.000506041	1.92534	0.00208	1.92695	0.000967098	1.93757	0.000843728	1.92637	0.000459613	1.92295	0.000309318
20.9805	0.12401	1.74473	0.00169	1.80975	0.000618789	1.85074	0.000134454	1.88581	0.00147	1.90972	0.00135	1.92322	0.000209523	1.92768	0.000614989	1.93332	0.00105	1.92637	2.64575e-05	1.92301	0.000526951
21.5491	0.08703	1.75826	0.00275	1.81505	0.000941771	1.8584	0.00278	1.88963	0.00137	1.91613	0.00236	1.92003	0.000466202	1.92714	0.000584817	1.92504	0.000600481	1.92223	0.000692082	1.92027	0.00133
21.8526	0.05165	1.7661	0.00371	1.82837	0.0045	1.86906	0.00134	1.89296	0.000823859	1.92427	0.00173	1.92372	0.00157	1.9323	0.0021	1.92735	0.0029	1.92484	0.00319	1.91443	0.000508538
22.0842	0.04378	1.76825	0.00088288	1.84653	0.00358	1.8741	0.000486861	1.89872	0.000596946	1.93675	0.00128	1.93325	0.00082479	1.95356	0.00263	1.94398	0.00181	1.93341	0.000238607	1.91499	0.000739962
22.2352	0.03013	1.76026	0.00248	1.85043	0.0023	1.86964	0.00385	1.8966	0.00171	1.9348	0.00224	1.93931	0.000952523	1.96451	0.00677	1.95558	0.00522	1.94112	0.00515	1.92892	0.0111
22.3583	0.01783	1.75302	0.00198	1.83856	0.00409	1.86029	0.000470886	1.8908	0.000968624	1.9323	0.00141	1.94666	0.00289	1.98118	0.0012	1.98248	0.00299	1.9767	0.00746	1.99064	0.00945
22.4451	0.0242634	1.7511	0.00508561	1.82564	0.00320949	1.86657	0.00383535	1.89572	0.00307822	1.93406	0.00102335	1.95153	0.00319704	1.96	0.00859956	1.96247	0.00978547	2.0254	0.00919376	2.02331	0.00846899
22.5553	0.00414416	1.75426	0.00765649	1.82603	0.0036434	1.88284	0.000867847	1.91006	0.000979323	1.91957	0.00381674	1.93276	0.00561856	1.94095	0.000604006	1.93799	0.00403854	1.96157	0.0114228	1.96402	0.00670863

## Sheet: KvsY
Distance	K		c/c*
y (um)	5.38897	std. err	5.5507	std. err	5.74641	std. err	5.95384	std. err	6.344	std. err	6.91901	std. err	7.43518	std. err	8.17426	std. err	8.88864	std. err	9.69462	std. err	10.5858	std. err	12.5905	std. err	16.4162	std. err	19.1187	std. err	20.9805	std. err	21.5491	std. err	21.8526	std. err	22.0842	std. err	22.2352	std. err	22.3583	std. err	22.4451	std. err	22.5553	std. err
8.3736	0.71246	0.00619	0.66631	0.00938	0.64586	0.00152	0.64053	0.00493	0.59388	0.01081	0.54563	0.0076	0.49954	0.01031	0.45041	0.00805	0.42342	0.00431	0.40843	0.00281	0.40118	0.00125	0.40211	0.00367	0.42005	0.00289	0.43574	0.00177	0.4469	0.0017	0.44937	0.000908375	0.44001	0.00231	0.43068	0.000923406	0.43955	0.00317	0.45369	0.000791419	0.434	0.00762176	0.462267	0.0072227
10.467	0.68778	0.00458	0.65323	0.00646	0.6376	0.000941134	0.62171	0.00722	0.56582	0.01197	0.51391	0.00865	0.46587	0.01073	0.41252	0.00945	0.38085	0.00483	0.36838	0.00202	0.36308	0.00189	0.36496	0.00727	0.38666	0.00204	0.39933	0.00175	0.40887	0.000731422	0.40599	0.00203	0.39168	0.00248	0.38474	0.00063104	0.38582	0.00112	0.38769	0.000271805	0.390983	0.00210195	0.433145	0.00730458
12.5604	0.65167	0.00212	0.63579	0.00362	0.61539	0.00391	0.57822	0.00934	0.52106	0.01162	0.4719	0.00834	0.4306	0.00953	0.37305	0.01178	0.32997	0.00539	0.32457	0.000299407	0.32922	0.00156	0.32699	0.000962503	0.33622	0.00126	0.34893	0.00312	0.36731	0.00291	0.36718	0.00258	0.35056	0.00326	0.34019	0.0015	0.34395	0.00117	0.35726	0.00143	0.363937	0.00242673	0.382817	0.00156222
14.6538	0.64197	0.00293	0.62004	0.00588	0.58958	0.00599	0.55367	0.00707	0.50606	0.01021	0.45429	0.00965	0.40133	0.01189	0.33869	0.01127	0.30179	0.00483	0.29928	0.000817849	0.31168	0.00162	0.30813	0.00423	0.31351	0.00292	0.33099	0.00209	0.34082	0.00174	0.34482	0.00101	0.337	0.00143	0.3336	0.000633991	0.32879	0.00184	0.33319	0.00181	0.336687	0.00218557	0.346187	0.00163094
16.7472	0.63681	0.00221	0.61885	0.00492	0.58807	0.00613	0.54733	0.008	0.49343	0.01155	0.44005	0.00904	0.39255	0.01069	0.33469	0.01058	0.29944	0.00374	0.29692	0.000699937	0.30197	0.00152	0.29824	0.000339918	0.3062	0.00118	0.317	0.00196	0.33248	0.0031	0.33629	0.00287	0.31622	0.00378	0.31008	0.0006592	0.30811	0.00168	0.30945	0.00198	0.321293	0.000571849	0.334485	0.00571263
18.8406	0.62223	0.000814541	0.61146	0.00452	0.57075	0.00997	0.51895	0.00728	0.47234	0.00942	0.42127	0.00906	0.37758	0.00923	0.32774	0.01022	0.29221	0.00386	0.292	0.00125	0.29265	0.00374	0.28831	0.00769	0.30781	0.000310859	0.31054	0.000958141	0.32163	0.00323	0.32491	0.00271	0.29933	0.0048	0.29433	0.00298	0.30458	0.00106	0.30617	0.00137	0.309647	0.00353196	0.318088	0.00586135
20.934	0.66687	0.00172	0.65029	0.00724	0.5843	0.01796	0.49923	0.01055	0.45167	0.0068	0.4123	0.00744	0.38157	0.00626	0.34111	0.0099	0.2996	0.0048	0.29586	0.00143	0.29674	0.00322	0.2901	0.00453	0.30406	0.000549029	0.30438	0.00126	0.30908	0.00273	0.31935	0.00109	0.30427	0.0043	0.29493	0.00126	0.30098	0.00173	0.30301	0.000567754	0.309727	0.0012738	0.31978	0.00588961
23.0274	0.64655	0.000996934	0.63976	0.00562	0.5787	0.01823	0.48956	0.01184	0.44292	0.00515	0.41173	0.0065	0.37801	0.00718	0.33377	0.01012	0.28966	0.00505	0.28625	0.00182	0.28469	0.00435	0.27314	0.00515	0.29599	0.00365	0.30738	0.00105	0.30776	0.00189	0.32109	0.00176	0.31282	0.00383	0.3025	0.000659048	0.30643	0.0012	0.30364	0.00181	0.308003	0.00664994	0.314875	0.00510706
25.1208	0.66271	0.00179	0.64085	0.01003	0.55339	0.02338	0.45436	0.00972	0.42262	0.00192	0.40107	0.00437	0.37815	0.00589	0.33284	0.01131	0.28834	0.00369	0.29508	0.00392	0.29895	0.0039	0.28694	0.00489	0.30386	0.00289	0.31286	0.00031184	0.31164	0.000343139	0.31845	0.000949602	0.31143	0.00328	0.30035	0.000597616	0.30226	0.000859787	0.29649	0.00283	0.29907	0.00877511	0.317943	0.00493307
27.2142	0.66848	0.00247	0.6361	0.01148	0.54811	0.0211	0.45662	0.0092	0.41629	0.00404	0.3932	0.00277	0.38347	0.00353	0.34644	0.01065	0.29767	0.00665	0.28603	0.000925221	0.28981	0.00159	0.28913	0.00537	0.30566	0.0014	0.30511	0.00235	0.29732	0.000156205	0.30935	0.00344	0.3143	0.00148	0.30266	0.00114	0.29733	0.000804184	0.28622	0.00336	0.294213	0.0098202	0.313682	0.00149341

## Sheet: KvsC
	K
c/c*	std.error	8 um	std.error	11 um	std.error	13 um	std.error	15 um	std.error	17 um	std.error	19 um	std.error	21 um	std.error	23 um	std.error	25 um	std.error	27 um	std.error
5.38897	0.02436	0.71246	0.00619	0.68778	0.00458	0.65167	0.00212	0.64197	0.00293	0.63681	0.00221	0.62223	0.000814541	0.66687	0.00172	0.64655	0.000996934	0.66271	0.00179	0.66848	0.00247
5.5507	0.0401	0.66631	0.00938	0.65323	0.00646	0.63579	0.00362	0.62004	0.00588	0.61885	0.00492	0.61146	0.00452	0.65029	0.00724	0.63976	0.00562	0.64085	0.01003	0.6361	0.01148
5.74641	0.03231	0.64586	0.00152	0.6376	0.000941134	0.61539	0.00391	0.58958	0.00599	0.58807	0.00613	0.57075	0.00997	0.5843	0.01796	0.5787	0.01823	0.55339	0.02338	0.54811	0.0211
5.95384	0.04729	0.64053	0.00493	0.62171	0.00722	0.57822	0.00934	0.55367	0.00707	0.54733	0.008	0.51895	0.00728	0.49923	0.01055	0.48956	0.01184	0.45436	0.00972	0.45662	0.0092
6.344	0.08132	0.59388	0.01081	0.56582	0.01197	0.52106	0.01162	0.50606	0.01021	0.49343	0.01155	0.47234	0.00942	0.45167	0.0068	0.44292	0.00515	0.42262	0.00192	0.41629	0.00404
6.91901	0.12322	0.54563	0.0076	0.51391	0.00865	0.4719	0.00834	0.45429	0.00965	0.44005	0.00904	0.42127	0.00906	0.4123	0.00744	0.41173	0.0065	0.40107	0.00437	0.3932	0.00277
7.43518	0.13231	0.49954	0.01031	0.46587	0.01073	0.4306	0.00953	0.40133	0.01189	0.39255	0.01069	0.37758	0.00923	0.38157	0.00626	0.37801	0.00718	0.37815	0.00589	0.38347	0.00353
8.17426	0.14547	0.45041	0.00805	0.41252	0.00945	0.37305	0.01178	0.33869	0.01127	0.33469	0.01058	0.32774	0.01022	0.34111	0.0099	0.33377	0.01012	0.33284	0.01131	0.34644	0.01065
8.88864	0.11357	0.42342	0.00431	0.38085	0.00483	0.32997	0.00539	0.30179	0.00483	0.29944	0.00374	0.29221	0.00386	0.2996	0.0048	0.28966	0.00505	0.28834	0.00369	0.29767	0.00665
9.69462	0.22122	0.40843	0.00281	0.36838	0.00202	0.32457	0.000299407	0.29928	0.000817849	0.29692	0.000699937	0.292	0.00125	0.29586	0.00143	0.28625	0.00182	0.29508	0.00392	0.28603	0.000925221
10.5858	0.20588	0.40118	0.00125	0.36308	0.00189	0.32922	0.00156	0.31168	0.00162	0.30197	0.00152	0.29265	0.00374	0.29674	0.00322	0.28469	0.00435	0.29895	0.0039	0.28981	0.00159
12.5905	1.13617	0.40211	0.00367	0.36496	0.00727	0.32699	0.000962503	0.30813	0.00423	0.29824	0.000339918	0.28831	0.00769	0.2901	0.00453	0.27314	0.00515	0.28694	0.00489	0.28913	0.00537
16.4162	0.65159	0.42005	0.00289	0.38666	0.00204	0.33622	0.00126	0.31351	0.00292	0.3062	0.00118	0.30781	0.000310859	0.30406	0.000549029	0.29599	0.00365	0.30386	0.00289	0.30566	0.0014
19.1187	0.57058	0.43574	0.00177	0.39933	0.00175	0.34893	0.00312	0.33099	0.00209	0.317	0.00196	0.31054	0.000958141	0.30438	0.00126	0.30738	0.00105	0.31286	0.00031184	0.30511	0.00235
20.9805	0.12401	0.4469	0.0017	0.40887	0.000731422	0.36731	0.00291	0.34082	0.00174	0.33248	0.0031	0.32163	0.00323	0.30908	0.00273	0.30776	0.00189	0.31164	0.000343139	0.29732	0.000156205
21.5491	0.08703	0.44937	0.000908375	0.40599	0.00203	0.36718	0.00258	0.34482	0.00101	0.33629	0.00287	0.32491	0.00271	0.31935	0.00109	0.32109	0.00176	0.31845	0.000949602	0.30935	0.00344
21.8526	0.05165	0.44001	0.00231	0.39168	0.00248	0.35056	0.00326	0.337	0.00143	0.31622	0.00378	0.29933	0.0048	0.30427	0.0043	0.31282	0.00383	0.31143	0.00328	0.3143	0.00148
22.0842	0.04378	0.43068	0.000923406	0.38474	0.00063104	0.34019	0.0015	0.3336	0.000633991	0.31008	0.0006592	0.29433	0.00298	0.29493	0.00126	0.3025	0.000659048	0.30035	0.000597616	0.30266	0.00114
22.2352	0.03013	0.43955	0.00317	0.38582	0.00112	0.34395	0.00117	0.32879	0.00184	0.30811	0.00168	0.30458	0.00106	0.30098	0.00173	0.30643	0.0012	0.30226	0.000859787	0.29733	0.000804184
22.3583	0.01783	0.45369	0.000791419	0.38769	0.000271805	0.35726	0.00143	0.33319	0.00181	0.30945	0.00198	0.30617	0.00137	0.30301	0.000567754	0.30364	0.00181	0.29649	0.00283	0.28622	0.00336
22.4451	0.0242634	0.434	0.00762176	0.390983	0.00210195	0.363937	0.00242673	0.336687	0.00218557	0.321293	0.000571849	0.309647	0.00353196	0.309727	0.0012738	0.308003	0.00664994	0.29907	0.00877511	0.294213	0.0098202
22.5553	0.00414416	0.462267	0.0072227	0.433145	0.00730458	0.382817	0.00156222	0.346187	0.00163094	0.334485	0.00571263	0.318088	0.00586135	0.31978	0.00588961	0.314875	0.00510706	0.317943	0.00493307	0.313682	0.00149341

## Sheet: KvsC_inset
	K
c/c*	std.error	8 um	std.error	11 um	std.error	13 um	std.error	15 um	std.error	17 um	std.error	19 um	std.error	21 um	std.error	23 um	std.error	25 um	std.error	27 um	std.error
20.9805	0.12401	0.4469	0.0017	0.40887	0.000731422	0.36731	0.00291	0.34082	0.00174	0.33248	0.0031	0.32163	0.00323	0.30908	0.00273	0.30776	0.00189	0.31164	0.000343139	0.29732	0.000156205
21.5491	0.08703	0.44937	0.000908375	0.40599	0.00203	0.36718	0.00258	0.34482	0.00101	0.33629	0.00287	0.32491	0.00271	0.31935	0.00109	0.32109	0.00176	0.31845	0.000949602	0.30935	0.00344
21.8526	0.05165	0.44001	0.00231	0.39168	0.00248	0.35056	0.00326	0.337	0.00143	0.31622	0.00378	0.29933	0.0048	0.30427	0.0043	0.31282	0.00383	0.31143	0.00328	0.3143	0.00148
22.0842	0.04378	0.43068	0.000923406	0.38474	0.00063104	0.34019	0.0015	0.3336	0.000633991	0.31008	0.0006592	0.29433	0.00298	0.29493	0.00126	0.3025	0.000659048	0.30035	0.000597616	0.30266	0.00114
22.2352	0.03013	0.43955	0.00317	0.38582	0.00112	0.34395	0.00117	0.32879	0.00184	0.30811	0.00168	0.30458	0.00106	0.30098	0.00173	0.30643	0.0012	0.30226	0.000859787	0.29733	0.000804184
22.3583	0.01783	0.45369	0.000791419	0.38769	0.000271805	0.35726	0.00143	0.33319	0.00181	0.30945	0.00198	0.30617	0.00137	0.30301	0.000567754	0.30364	0.00181	0.29649	0.00283	0.28622	0.00336
22.4451	0.0242634	0.434	0.00762176	0.390983	0.00210195	0.363937	0.00242673	0.336687	0.00218557	0.321293	0.000571849	0.309647	0.00353196	0.309727	0.0012738	0.308003	0.00664994	0.29907	0.00877511	0.294213	0.0098202
22.5553	0.00414416	0.462267	0.0072227	0.433145	0.00730458	0.382817	0.00156222	0.346187	0.00163094	0.334485	0.00571263	0.318088	0.00586135	0.31978	0.00588961	0.314875	0.00510706	0.317943	0.00493307	0.313682	0.00149341

[truncated: 5 more sheets: MFvsT, Tauvsq_2, Tauq2vsq_2, AFvY_ti_tf, Tauvsq_ti_tf]
